# Supplementary material for: How the health-seeking behaviour of pregnant women affects neonatal outcomes: findings of system dynamics modelling in Pakistan
Source: PubMed Central journal article supplement — BMJ Glob Health. 2019 Mar 30;4(2):e001242. doi: 10.1136/bmjgh-2018-001242 (PMC6441297; doi:10.1136/bmjgh-2018-001242), 2019-03-30
Supplement: bmjgh-2018-001242supp001.pdf [file bmjgh-2018-001242supp001.pdf]

# Supplementary Material 1

Insert Figure S1 here

Figure S1: Stock and Flow diagram of public sector health-seeking

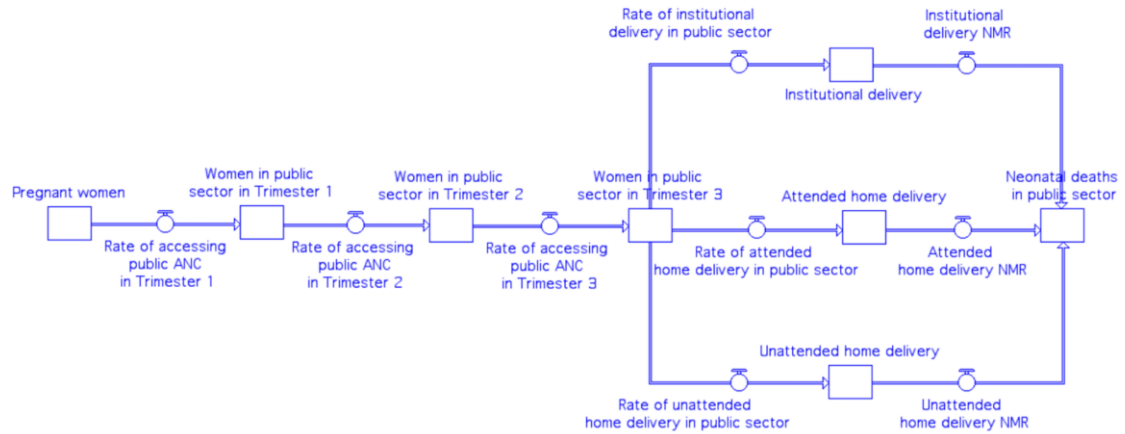

Key ANC: antenatal care NMR: neonatal mortality rate

## Supplementary Material 2

A cohort of 60 women were purposively sampled from urban and rural Punjab, Pakistan. A total of 258 depth interviews and 60 hours of direct observations were conducted at 3 monthly intervals during the course of pregnancy and up to 3 months post-partum with: the pregnant women, families and all care providers involved. Additionally, 35 regional public healthcare providers NOT directly involved in the care of the 60 women were also interviewed. A mapping of health seeking behaviours and drivers together with mother and neonate outcomes was completed. Comparison of this cohort with national level data is presented below [Table 1].

| <b>Table. 1 Country and sample cohort social epidemiology profile [PDHS 2012-13]</b>                                                                                                         |                 |               |
|----------------------------------------------------------------------------------------------------------------------------------------------------------------------------------------------|-----------------|---------------|
| <b>Social determinant</b>                                                                                                                                                                    | <b>Pakistan</b> | <b>Sample</b> |
| <b>Socio-demographic factors and social structure</b>                                                                                                                                        |                 |               |
| Total fertility rate <sup>1</sup> (%)                                                                                                                                                        | 3.0             | 3.3           |
| Urban population (%)                                                                                                                                                                         | 36              | 35            |
| Population in lower wealth quantiles (%)                                                                                                                                                     | 60              | 62            |
| <b>Education level and gender discrimination (status of women)</b>                                                                                                                           |                 |               |
| Adult literacy rate (female)                                                                                                                                                                 | 34.6            | 50            |
| Primary schooling (female)                                                                                                                                                                   | 62              | -             |
| Secondary schooling (female)                                                                                                                                                                 | 29              | 28.3          |
| <sup>1</sup> <b>Total fertility rate:</b> calculated as average number of births per woman in a population group, if the woman survives from birth through the end of her reproductive life. |                 |               |

## Supplementary Material 3

### Combinations of service uptake rate and trimester

| <b>Intervention 1</b> |                                                                                          |                                                                                          |                                                                                          |
|-----------------------|------------------------------------------------------------------------------------------|------------------------------------------------------------------------------------------|------------------------------------------------------------------------------------------|
|                       | 25% coverage rate                                                                        | 50% coverage rate                                                                        | 75% coverage rate                                                                        |
| Trimester 1           | 25% consumers previously in Pathway A moved to Pathway B, C, and D evenly in trimester 1 | 50% consumers previously in Pathway A moved to Pathway B, C, and D evenly in trimester 1 | 75% consumers previously in Pathway A moved to Pathway B, C, and D evenly in trimester 1 |
| Trimester 2           | 25% consumers previously in Pathway A moved to Pathway B, C, and D evenly in trimester 2 | 50% consumers previously in Pathway A moved to Pathway B, C, and D evenly in trimester 2 | 75% consumers previously in Pathway A moved to Pathway B, C, and D evenly in trimester 2 |
| Trimester 3           | 25% consumers previously in Pathway A moved to Pathway B, C, and D evenly in trimester 3 | 50% consumers previously in Pathway A moved to Pathway B, C, and D evenly in trimester 3 | 75% consumers previously in Pathway A moved to Pathway B, C, and D evenly in trimester 3 |
| <b>Intervention 2</b> |                                                                                          |                                                                                          |                                                                                          |
|                       | 25% coverage rate                                                                        | 50% coverage rate                                                                        | 75% coverage rate                                                                        |
| Trimester 1           | 25% consumers previously in Pathway A moved to Pathway B and D evenly in trimester 1     | 50% consumers previously in Pathway A moved to Pathway B and D evenly in trimester 1     | 75% consumers previously in Pathway A moved to Pathway B and D evenly in trimester 1     |
| Trimester 2           | 25% consumers previously in Pathway A moved to Pathway B and D evenly in trimester 2     | 50% consumers previously in Pathway A moved to Pathway B and D evenly in trimester 2     | 75% consumers previously in Pathway A moved to Pathway B and D evenly in trimester 2     |
| Trimester 3           | 25% consumers previously in Pathway A moved to Pathway B and D evenly in trimester 3     | 50% consumers previously in Pathway A moved to Pathway B and D evenly in trimester 3     | 75% consumers previously in Pathway A moved to Pathway B and D evenly in trimester 3     |
| <b>Intervention 3</b> |                                                                                          |                                                                                          |                                                                                          |
|                       | 25% coverage rate                                                                        | 50% coverage rate                                                                        | 75% coverage rate                                                                        |
| Childbirth            | 25% consumers previously chose unattended home delivery moved to institutional delivery  | 50% consumers previously chose unattended home delivery moved to institutional delivery  | 75% consumers previously chose unattended home delivery moved to institutional delivery  |
| <b>Intervention 4</b> |                                                                                          |                                                                                          |                                                                                          |
|                       | 25% coverage rate                                                                        | 50% coverage rate                                                                        | 75% coverage rate                                                                        |
| Childbirth            | 25% consumers previously chose unattended home delivery moved to attended home delivery  | 50% consumers previously chose unattended home delivery moved to attended home delivery  | 75% consumers previously chose unattended home delivery moved to attended home delivery  |

**Initial model conditions reflecting the proportion of women in each pathway (service sector)**

| <b>Stock</b>                                | <b>Stock Notation</b> | <b>Initial Value: Proportion</b> |
|---------------------------------------------|-----------------------|----------------------------------|
| Entering Pathway A in Trimester 1           | A1                    | 0.48                             |
| Entering Pathway B in Trimester 1           | B1                    | 0.10                             |
| Entering Pathway C in Trimester 1           | C1                    | 0.29                             |
| Entering Pathway D in Trimester 1           | D1                    | 0.10                             |
| Entering Pathway E in Trimester 1           | E1                    | 0.02                             |
| Staying in Pathway A in Trimester 2         | A2                    | 0.54                             |
| Staying in Pathway B in Trimester 2         | B2                    | 0.33                             |
| Staying in Pathway C in Trimester 2         | C2                    | 0.82                             |
| Staying in Pathway D in Trimester 2         | D2                    | 0.33                             |
| Staying in Pathway E in Trimester 2         | E2                    | 1.00                             |
| Staying in Pathway A Trimester 3            | A3                    | 0.80                             |
| Staying in Pathway B in Trimester 3         | B3                    | 0.55                             |
| Staying in Pathway C in Trimester 3         | C3                    | 0.84                             |
| Staying in Pathway D in Trimester 3         | D3                    | 0.67                             |
| Staying in Pathway E in Trimester 3         | E3                    | 0.3                              |
| Entering Pathway A institutional delivery   | InstDeA               | 0.21                             |
| Entering Pathway A attended home delivery   | AnDeA                 | 0.65                             |
| Entering Pathway A unattended home delivery | UnDeA                 | 0.14                             |
| Entering Pathway B institutional delivery   | InstDeB               | 0.00                             |
| Entering Pathway B attended home delivery   | AnDeB                 | 0.78                             |
| Entering Pathway B unattended home delivery | UnDeB                 | 0.22                             |
| Entering Pathway C institutional delivery   | InstDeC               | 0.50                             |
| Entering Pathway C attended home delivery   | AnDeC                 | 0.27                             |
| Entering Pathway C unattended home delivery | UnDeC                 | 0.23                             |
| Entering Pathway D institutional delivery   | InstDeD               | 0.00                             |
| Entering Pathway D attended home delivery   | AnDeD                 | 0.62                             |
| Entering Pathway D unattended home delivery | UnDeD                 | 0.38                             |
| Entering Pathway E institutional delivery   | InstDeE               | 0.00                             |
| Entering Pathway E attended home delivery   | AnDeE                 | 1.00                             |
| Entering Pathway E unattended home delivery | UnDeE                 | 0.00                             |

## Baseline model parameters

| Parameter                                                                         | Notation | Value       |
|-----------------------------------------------------------------------------------|----------|-------------|
| Rate of not seeking care services in Trimester 1                                  | A1       | 0.48(28/58) |
| Rate of seeking care services in <i>public</i> domain in Trimester 1              | B1       | 0.10(6/58)  |
| Rate of seeking care services in <i>private</i> domain in Trimester 1             | C1       | 0.29(17/58) |
| Rate of seeking care services in <i>traditional</i> domain in Trimester 1         | D1       | 0.10(6/58)  |
| Rate of seeking care services in <i>charity</i> domain in Trimester 1             | E1       | 0.02(1/58)  |
| Rate of not seeking care services in Trimester 2                                  | A2       | 0.54(15/28) |
| Rate of starting accessing services in <i>public</i> domain in Trimester 2        | AB2      | 0.25(7/28)  |
| Rate of starting accessing services in <i>private</i> domain in Trimester 2       | AC2      | 0.21(6/28)  |
| Rate of starting accessing services in <i>traditional</i> domain in Trimester 2   | AD2      | 0.00(0/28)  |
| Rate of starting accessing services in <i>charity</i> domain in Trimester 2       | AE2      | 0.00(0/28)  |
| Rate of keeping seeking care services in <i>public</i> domain Trimester 2         | B2       | 0.33(2/6)   |
| Rate of stopping accessing services in <i>public</i> domain Trimester 2           | BA2      | 0.00(0/6)   |
| Rate of switching from <i>public</i> to <i>private</i> domain in Trimester 2      | BC2      | 0.67(4/6)   |
| Rate of switching from <i>public</i> to <i>traditional</i> domain in Trimester 2  | BD2      | 0.00(0/6)   |
| Rate of switching from <i>public</i> to <i>charity</i> domain in Trimester 2      | BE2      | 0.00(0/6)   |
| Rate of keeping seeking care services in <i>private</i> domain Trimester 2        | C2       | 0.82(14/17) |
| Rate of stopping accessing services in <i>private</i> domain Trimester 2          | CA2      | 0.00(0/17)  |
| Rate of switching from <i>private</i> to <i>public</i> domain in Trimester 2      | CB2      | 0.00(0/17)  |
| Rate of switching from <i>private</i> to <i>traditional</i> domain in Trimester 2 | CD2      | 0.06(1/17)  |
| Rate of switching from <i>private</i> to <i>charity</i> domain in Trimester 2     | CE2      | 0.12(2/17)  |
| Rate of keeping seeking care services in <i>traditional</i> domain Trimester 2    | D2       | 0.33 (2/6)  |
| Rate of stopping accessing services in <i>traditional</i> domain Trimester 2      | DA2      | 0.00(0/6)   |
| Rate of switching from <i>traditional</i> to <i>public</i> domain in Trimester 2  | DB2      | 0.33 (2/6)  |
| Rate of switching from <i>traditional</i> to <i>private</i> domain in Trimester 2 | DC2      | 0.33 (2/6)  |
| Rate of switching from <i>traditional</i> to <i>charity</i> domain in Trimester 2 | DE2      | 0.00(0/6)   |
| Rate of keeping seeking care services in <i>charity</i> domain Trimester 2        | E2       | 1.00(1/1)   |
| Rate of stopping accessing services in <i>charity</i> domain Trimester 2          | EA2      | 0.00(0/1)   |
| Rate of switching from <i>charity</i> to <i>public</i> domain in Trimester 2      | EB2      | 0.00(0/1)   |
| Rate of switching from <i>charity</i> to <i>private</i> domain in Trimester 2     | EC2      | 0.00(0/1)   |
| Rate of switching from <i>charity</i> to <i>traditional</i> domain in Trimester 2 | ED2      | 0.00(0/1)   |
| Rate of not seeking care services in Trimester 3                                  | A3       | 0.80(12/15) |
| Rate of starting accessing services in <i>public</i> domain in Trimester 3        | AB3      | 0.13(2/15)  |
| Rate of starting accessing services in <i>private</i> domain in Trimester 3       | AC3      | 0.00(0/15)  |
| Rate of starting accessing services in <i>traditional</i> domain in Trimester 3   | AD3      | 0.07(1/15)  |
| Rate of starting accessing services in <i>charity</i> domain in Trimester 3       | AE3      | 0.00(0/15)  |
| Rate of keeping seeking care services in <i>public</i> domain Trimester 3         | B3       | 0.55(6/11)  |
| Rate of stopping accessing services in <i>public</i> domain Trimester 3           | BA3      | 0.00(0/11)  |
| Rate of switching from <i>public</i> to <i>private</i> domain in Trimester 3      | BC3      | 0.27(3/11)  |
| Rate of switching from <i>public</i> to <i>traditional</i> domain in Trimester 3  | BD3      | 0.18(2/11)  |
| Rate of switching from <i>public</i> to <i>charity</i> domain in Trimester 3      | BE3      | 0.00 (0/11) |
| Rate of keeping seeking care services in <i>private</i> domain Trimester 3        | C3       | 0.84(22/26) |
| Rate of stopping accessing services in <i>private</i> domain Trimester 3          | CA3      | 0.08(2/26)  |

---

**Appendix 4 continued**

---

|                                                                                   |         |             |
|-----------------------------------------------------------------------------------|---------|-------------|
| Rate of switching from <i>private</i> to <i>public</i> domain in Trimester 3      | CB3     | 0.00 (0/26) |
| Rate of switching from <i>private</i> to <i>traditional</i> domain in Trimester 3 | CD3     | 0.08(2/26)  |
| Rate of switching from <i>private</i> to <i>charity</i> domain in Trimester 3     | CE3     | 0.00 (0/26) |
| Rate of keeping seeking care services in <i>traditional</i> domain Tri 3          | D3      | 0.67(2/3)   |
| Rate of stopping accessing services in <i>traditional</i> domain Tri 3            | DA3     | 0.00 (0/3)  |
| Rate of switching from <i>traditional</i> to <i>public</i> domain in Trimester 3  | DB3     | 0.33(1/3)   |
| Rate of switching from <i>traditional</i> to <i>private</i> domain in Trimester 3 | DC3     | 0.00 (0/3)  |
| Rate of switching from <i>traditional</i> to <i>charity</i> domain in Trimester 3 | DE3     | 0.00 (0/3)  |
| Rate of keeping seeking care services in <i>charity</i> domain in Trimester 3     | E3      | 0.33(1/3)   |
| Rate of stopping accessing services in <i>charity</i> domain in Trimester 3       | EA3     | 0.00 (0/3)  |
| Rate of switching from <i>charity</i> to <i>public</i> domain in Trimester 3      | EB3     | 0.00 (0/3)  |
| Rate of switching from <i>charity</i> to <i>private</i> domain in Trimester 3     | EC3     | 0.33(1/3)   |
| Rate of switching from <i>charity</i> to <i>traditional</i> domain in Trimester 3 | ED3     | 0.33(1/3)   |
| Rate of institutional delivery with no service in Trimester 3                     | InstDeA | 0.21(3/14)  |
| Rate of attended home delivery with no service in Trimester 3                     | AnDeA   | 0.65(9/14)  |
| Rate of unattended home delivery with no service in Trimester 3                   | UnDeA   | 0.14(2/14)  |
| Rate of institutional delivery with <i>public</i> service in Trimester 3          | InstDeB | 0.00(0/9)   |
| Rate of attended home delivery with <i>public</i> service in Trimester 3          | AnDeB   | 0.78(7/9)   |
| Rate of unattended home delivery with <i>public</i> service in Trimester 3        | UnDeB   | 0.22(2/9)   |
| Rate of institutional delivery with <i>private</i> service in Trimester 3         | InstDeC | 0.50(13/26) |
| Rate of attended home delivery with <i>private</i> service in Trimester 3         | AnDeC   | 0.27(7/26)  |
| Rate of unattended home delivery with <i>private</i> service in Trimester 3       | UnDeC   | 0.23(6/26)  |
| Rate of institutional delivery with <i>traditional</i> service in Trimester 3     | InstDeD | 0.00(0/8)   |
| Rate of attended home delivery with <i>traditional</i> service in Trimester 3     | AnDeD   | 0.62(5/8)   |
| Rate of unattended home delivery with <i>traditional</i> service in Trimester 3   | UnDeD   | 0.38(3/8)   |
| Rate of institutional delivery with <i>charity</i> service in Trimester 3         | InstDeE | 0.00(0/1)   |
| Rate of attended home delivery with <i>charity</i> service in Trimester 3         | AnDeE   | 1.00(1/1)   |
| Rate of unattended home delivery with <i>charity</i> service in Trimester 3       | UnDeE   | 0.00(0/1)   |
| Neonatal mortality rate of institutional delivery                                 | NNMRi   | 2.85%       |
| Neonatal mortality rate of attended home delivery                                 | NNMRa   | 3.50%       |
| Neonatal mortality rate of unattended home delivery                               | NNMRu   | 4.88%       |
| Neonatal mortality of institutional delivery in Pathway A                         | NNMiA   | 2.85%       |
| Neonatal mortality of attended home delivery in Pathway A                         | NNMaA   | 3.50%       |
| Neonatal mortality of unattended home delivery in Pathway A                       | NNMuA   | 4.88%       |
| Neonatal mortality of institutional delivery in Pathway B                         | NNMiB   | 2.85%       |
| Neonatal mortality of attended home delivery in Pathway B                         | NNMaB   | 3.50%       |
| Neonatal mortality of unattended home delivery in Pathway B                       | NNMuB   | 4.88%       |
| Neonatal mortality of institutional delivery in Pathway C                         | NNMiC   | 2.85%       |
| Neonatal mortality of attended home delivery in Pathway C                         | NNMaC   | 3.50%       |
| Neonatal mortality of unattended home delivery in Pathway C                       | NNMuC   | 4.88%       |
| Neonatal mortality of institutional delivery in Pathway D                         | NNMiD   | 2.85%       |
| Neonatal mortality of attended home delivery in Pathway D                         | NNMaD   | 3.50%       |
| Neonatal mortality of unattended home delivery in Pathway D                       | NNMuD   | 4.88%       |

---

---

**Appendix 4 continued**

---

|                                                             |       |       |
|-------------------------------------------------------------|-------|-------|
| Neonatal mortality of institutional delivery in Pathway E   | NNMiE | 2.85% |
| Neonatal mortality of attended home delivery in Pathway E   | NNMaE | 3.50% |
| Neonatal mortality of unattended home delivery in Pathway E | NNMuE | 4.88% |

---
